# Supplementary material for: A comparative study on the synthesis and crystal structures of Ni(ii) complexes bearing tetradentate N2O2 donor Schiff bases: biomolecular interactions, cytotoxicities and molecular docking
Source: Royal Society of Chemistry journal article supplement (doi:10.1039/d4nj01051e), 2024-01-01
Supplement: d4nj01051e1.pdf [file d4nj01051e1.pdf]

## **Comparative study on synthesis and crystal structures of Ni(II) complexes bearing tetradentate N<sub>2</sub>O<sub>2</sub> donor Schiff bases: Biomolecular interactions, cytotoxicities and molecular docking**

**Duygu İnci Özbağcı<sup>1</sup>, Sevinç İlkar Erdağlı<sup>2</sup>, İpek Aydın<sup>3</sup>, Rahmiye Aydın<sup>1</sup>, Yunus Zorlu<sup>4</sup>, Ferda Arı<sup>3</sup>**

<sup>1</sup> Department of Chemistry, Faculty of Arts and Sciences, Bursa Uludag University, 16059 Bursa, Turkey;

<sup>2</sup> Department of Chemistry, Faculty of Arts and Sciences, Kocaeli University, Umuttepe campus, 41380 Kocaeli, Turkey;

<sup>3</sup> Department of Biology, Faculty of Arts and Sciences, Bursa Uludag University, 16059 Bursa, Turkey;

<sup>4</sup> Department of Chemistry, Faculty of Science, Gebze Technical University, 41400, Gebze, Kocaeli, Turkey

### **Correspondence**

Duygu İnci Özbağcı

Department of Chemistry, Faculty of Arts and Sciences, Bursa Uludag University, 16059 Bursa, Turkey

*E-mail:* dyginci@uludag.edu.tr

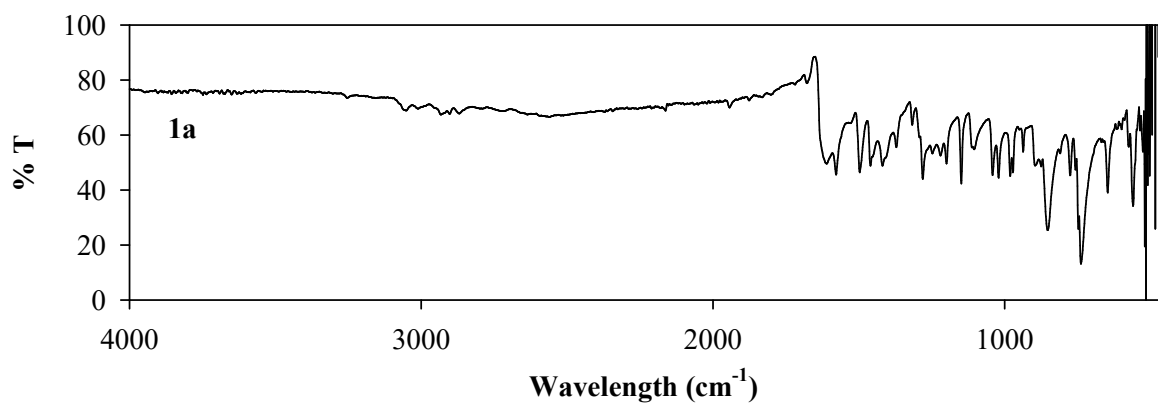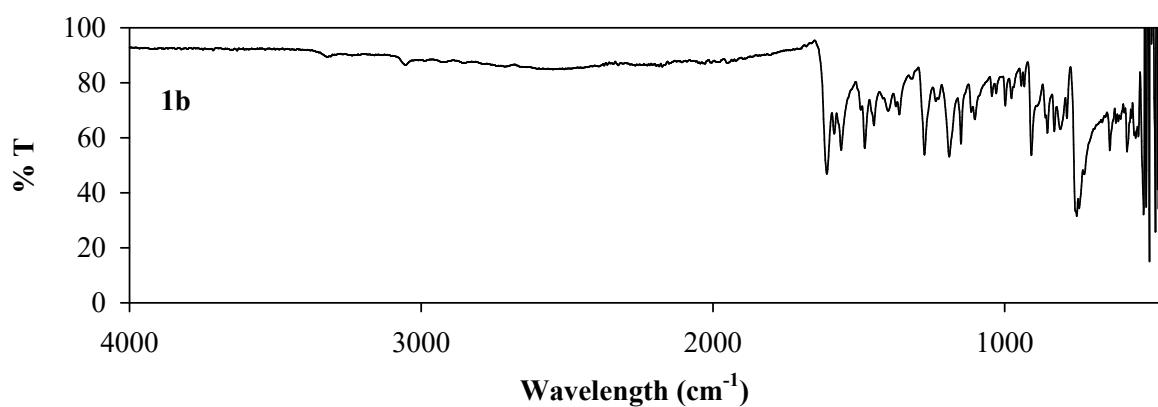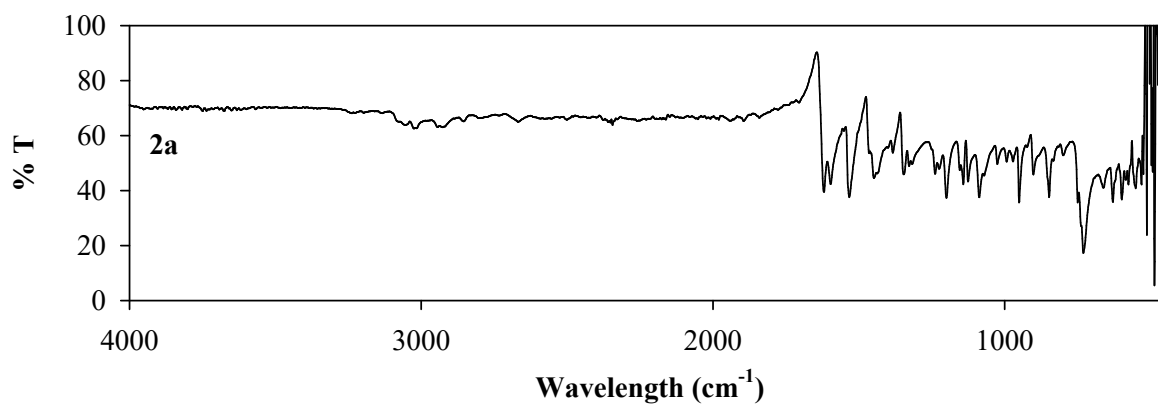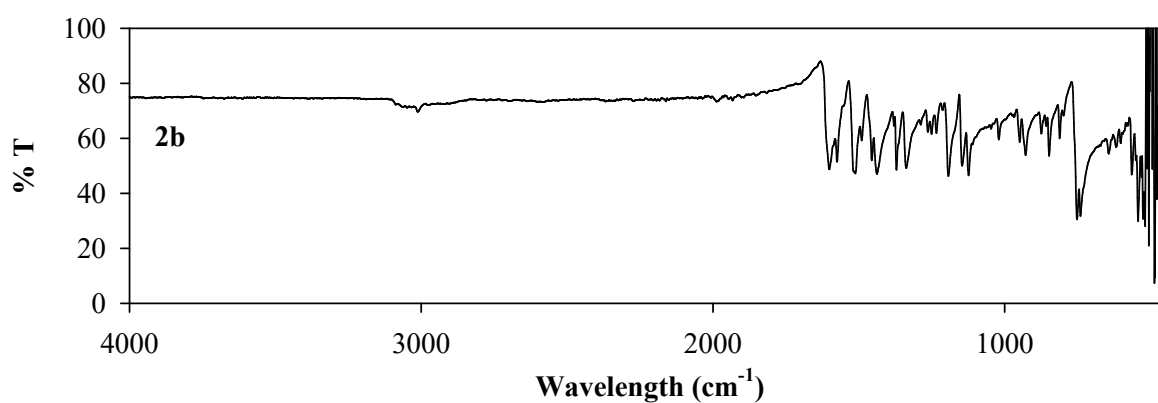

**Fig. S1** FTIR spectra of the **1a-b** and **2a-b**

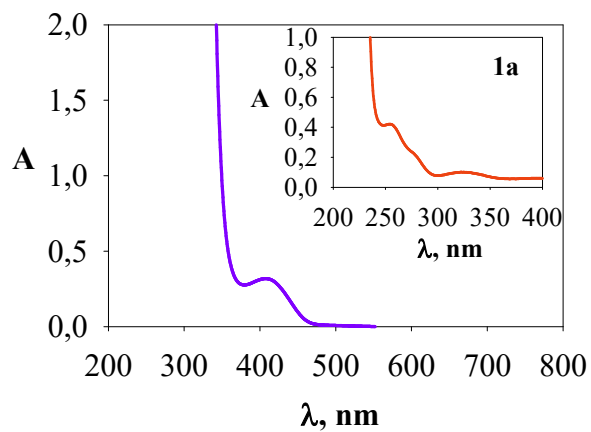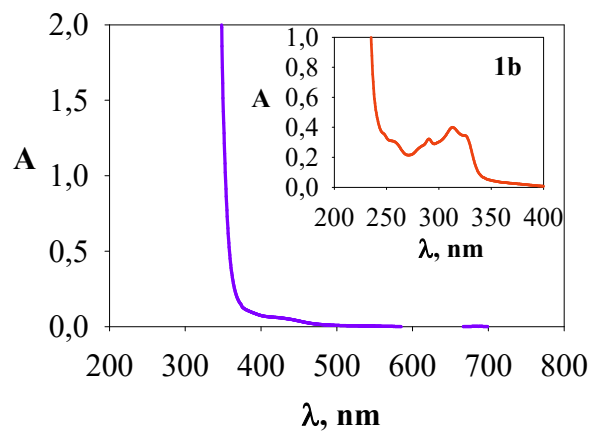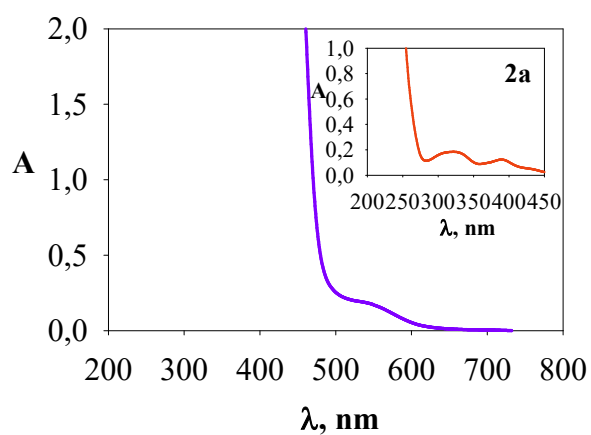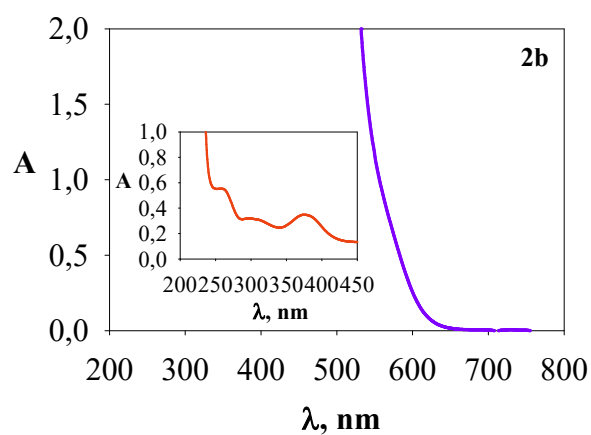

**Fig. S2** Electronic absorption spectra of the **1a-b** and **2a-b**

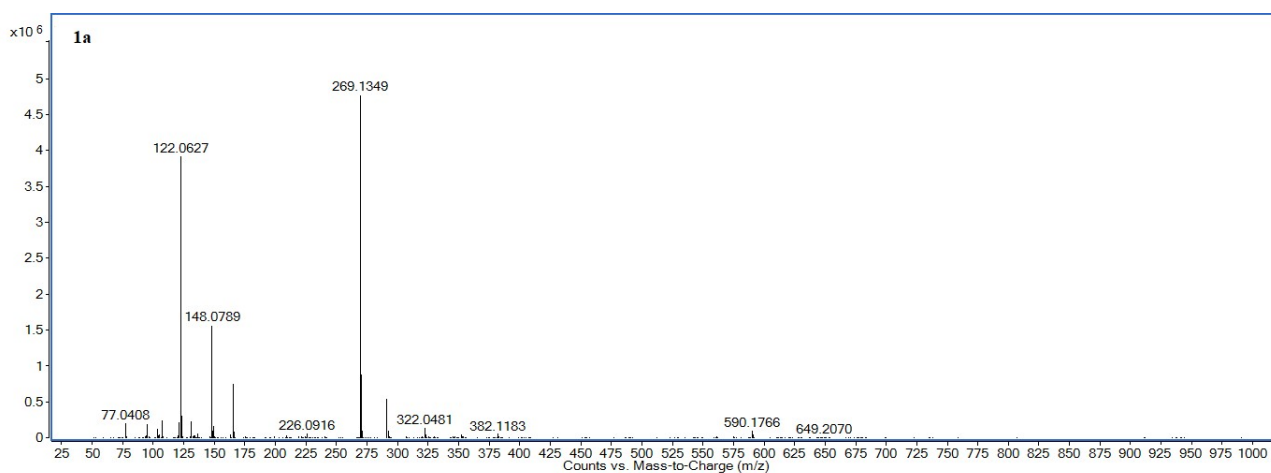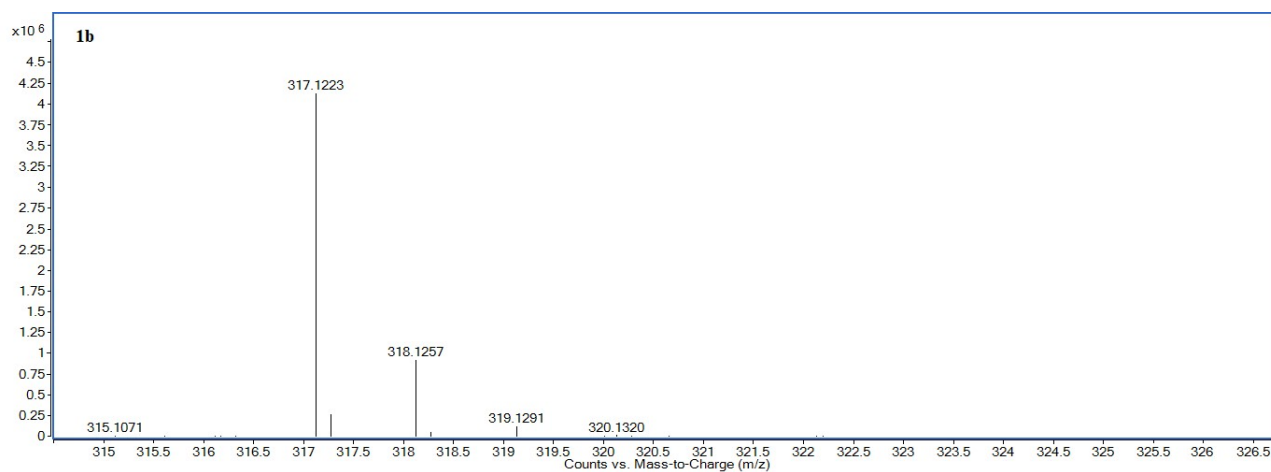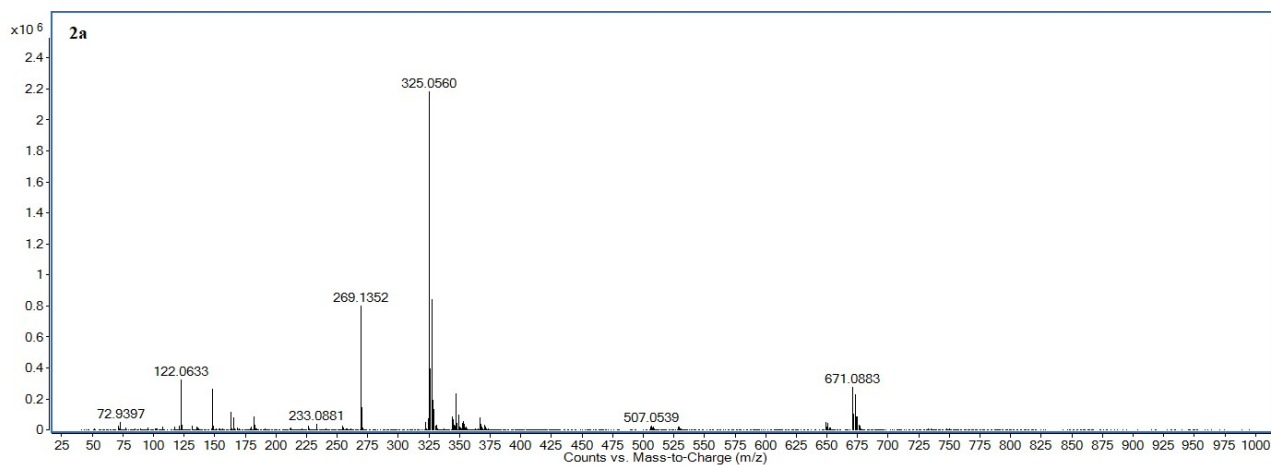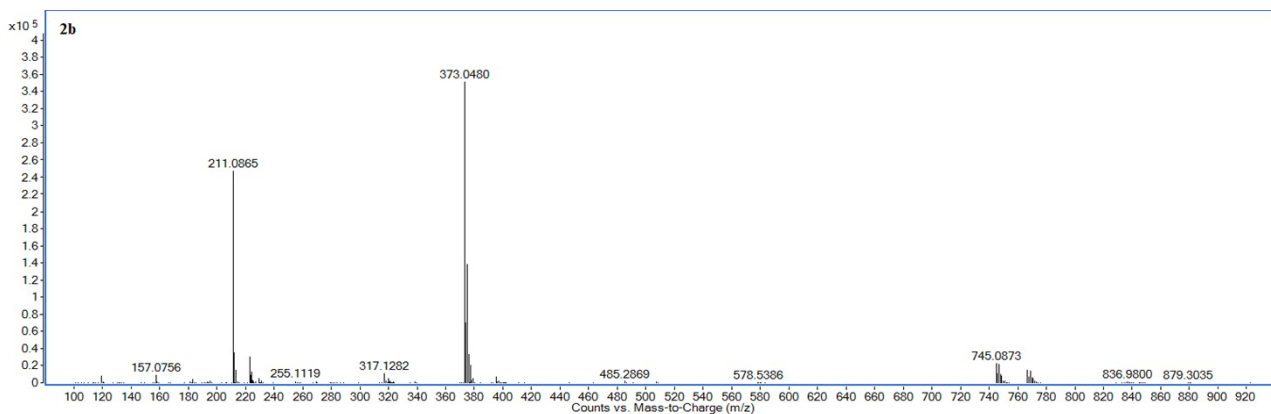

**Fig. S3** ESI-MS spectra of the **1a-b** and **2a-b**

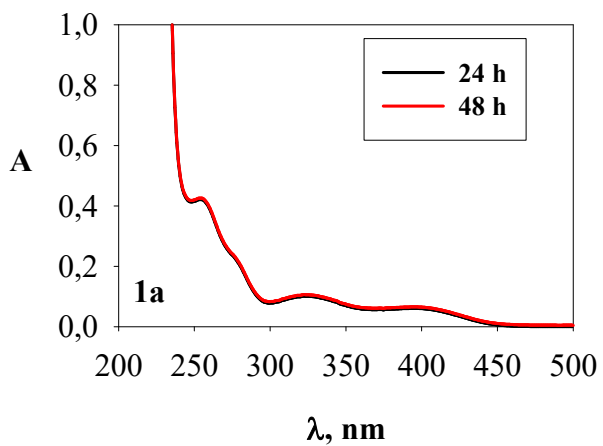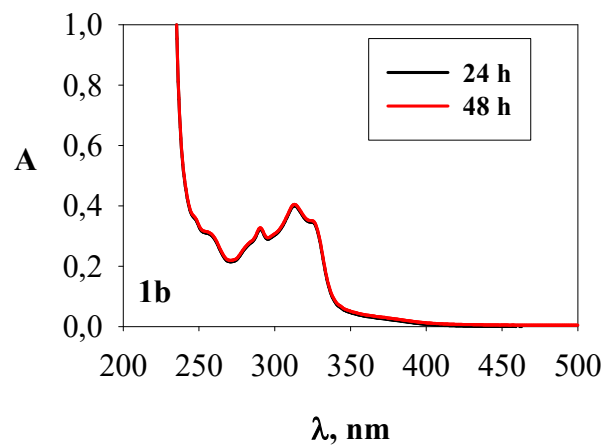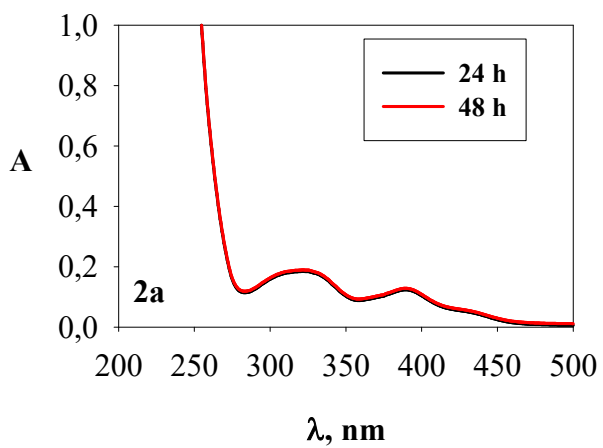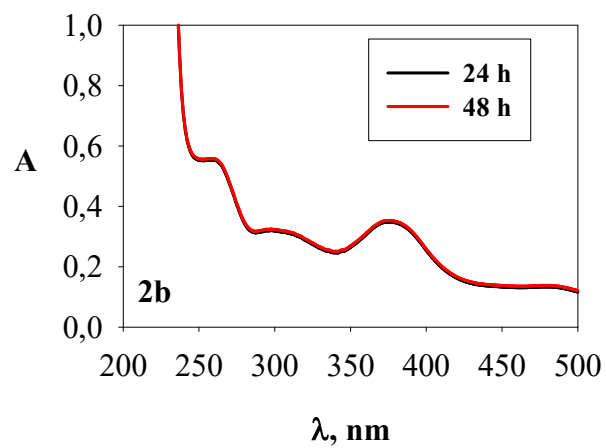

**Fig. S4** Electronic absorption spectra of the **1a-b** and **2a-b** in DMSO after standing in different times at ambient temperature.

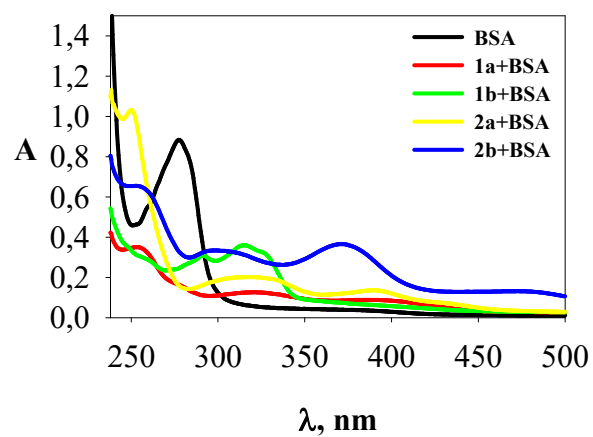

**Fig. S5** Electronic absorption spectra of the **1a-b** and **2a-b** upon addition of BSA

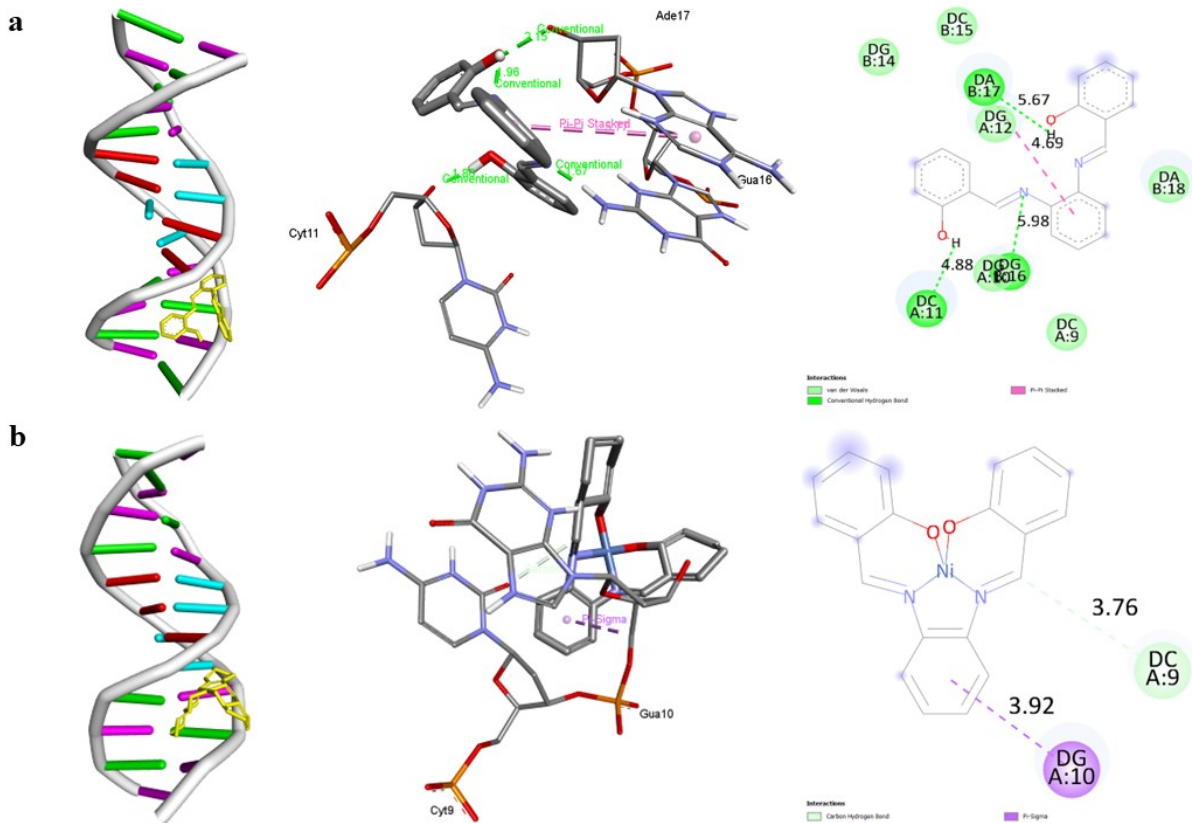

**Fig. S6** 3D docking structure, 2D and ligand interactions of the **1b** (a) and the **2b** (b) with active sites of B-DNA dodecamer.

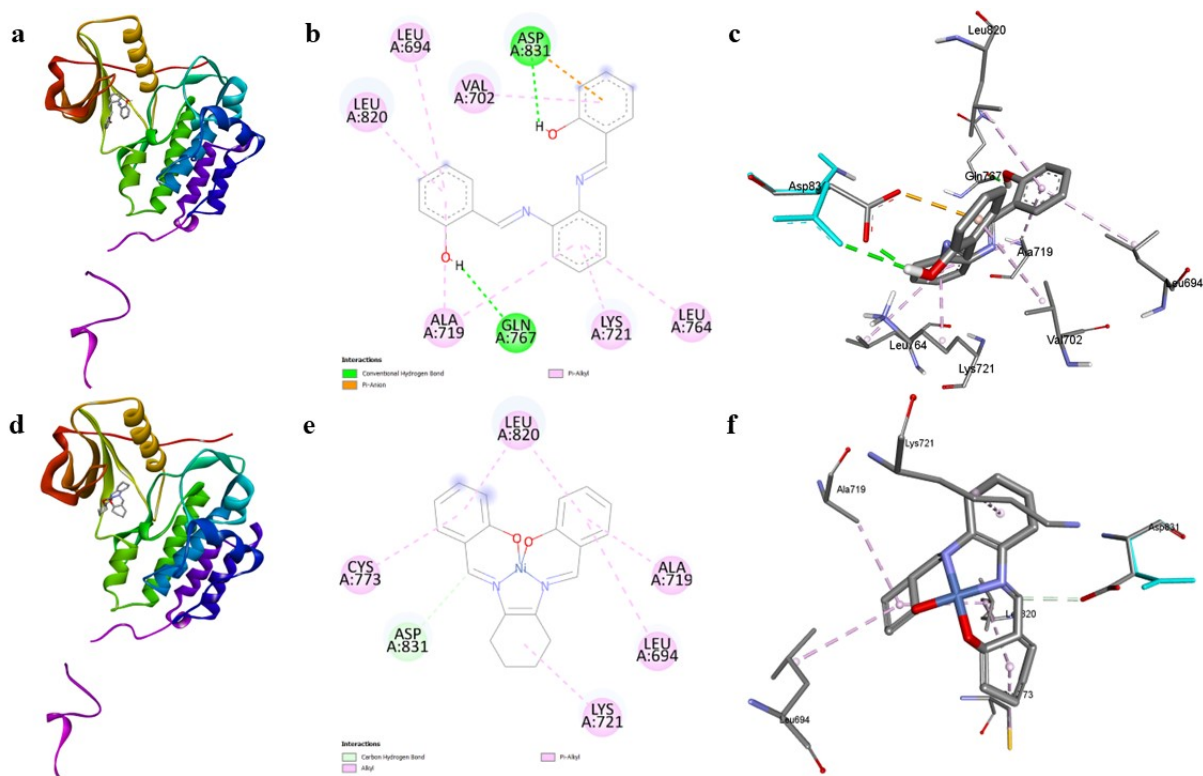

**Fig. S7** The **1b** and **2b** superpositions (a and d) and the diagram of intermolecular interactions, 2D (b and e), and 3D structures of the binding sites (c and f) in the complex with tyrosine kinase receptor (PDB ID: 1M17). The Hydrogen-bond interaction is depicted with the green dotted line.
